# Supplementary material for: Microstructural characterization and film-forming mechanism of a phosphate chemical conversion ceramic coating prepared on the surface of 2A12 aluminum alloy
Source: Royal Society of Chemistry journal article supplement (doi:10.1039/c9ra01173k), 2019-01-01
Supplement: c9ra01173k1.pdf [file c9ra01173k1.pdf]

## **Supplementary Information**

### **Microstructural characterization and film-forming mechanism of phosphate chemical conversion ceramic coating prepared on the surface of 2A12 aluminum alloy**

*Shuai Huang, Jian Wang,\* Xiaowei Wei, Yuli Zhou, Lijun Wang and Jianjun Zhang*

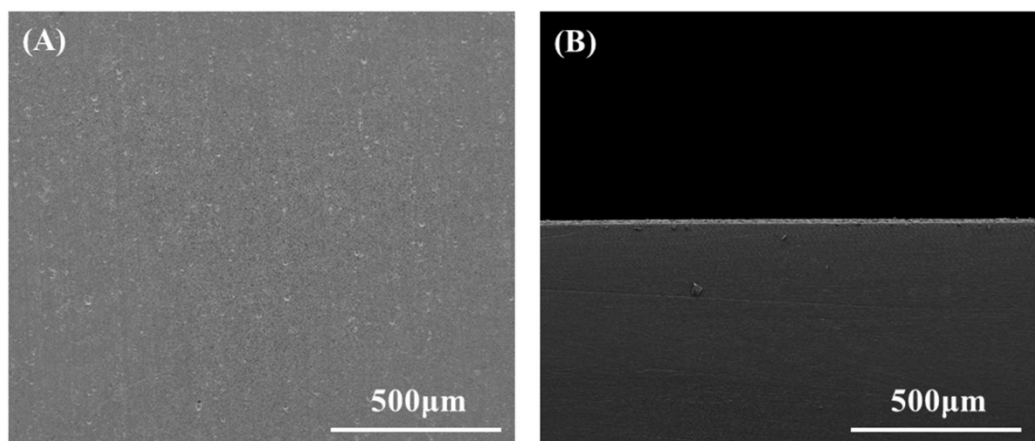

**Fig. S1.** Surface morphology (A) and cross-section morphology (B) of PCC ceramic coatings on the surface of 2A12 Al alloys.

**Table S1** Weight loss of different types of coating

| Coating                        | weight loss / % | Reference        |
|--------------------------------|-----------------|------------------|
| Phytic acid conversion coating | >30             | [1]              |
| Phosphate conversion coatings  | ~40             | [2]              |
| Calcium phosphate coatings     | ~50             | [3]              |
| Epoxy coating                  | >50             | [4]              |
| Polyurethane coatings          | ~80             | [5]              |
| Polymeric coatings             | >80             | [6]              |
| Phosphate conversion coatings  | 28              | <b>This work</b> |

**The references cited above:**

- [1] R. Y. Zhang, S. Cai, G. H. Xu, *Appl. Surf. Sci.* 2014, **313**, 896-904.
- [2] L. P. Wu, L. Zhao, J. H. Dong, *Electrochim. Acta*, 2014, **145**, 71-80.
- [3] A. Roy, S. S. Singh, M. K. Datta, *Mater. Sci. Eng. B* 2011, **176**, 1679-1689.
- [4] M. Bučko, V. Miškovič-Stankovič, *J. Rogan, Prog. Org. Coat.* 2015, **79**, 8-16.

[5] C. K. Patil, H. D. Jirimali, M. S. Mahajan, *React. Funct. Polym.* 2019, **139**, 142-152.

[6] C. H. Liu, T. C. Li, J. H. Zhang, *Prog. Org. Coat.* 2016, **90**, 21-27.

**Table S2** Critical load ( $L_C$ ) of different types of coating

| Types                                 | $L_C / N$ | Reference        |
|---------------------------------------|-----------|------------------|
| Zinc Phosphate Conversion Coating     | 46        | [50]             |
| Phosphate chemical conversion coating | 50.7      | [51]             |
| Fluoride-phosphate conversion coating | 63.5      | [52]             |
| PCC ceramic coating                   | 178.55    | <b>This work</b> |

**The references cited above:**

[50] X. L. Shi, H. M. Zhu, A. Valanezhad, *Phys. Status Solidi A*, 2018, **215**, 1800143 (1-7).

[51] C. C. Jiang, G. Y. Xiao, X. Zhang, *New J. Chem.*, 2016, **40**, 1347-1353.

[52] S. X. Wang, X. H. Liu, L. Q. Wang, *RSC Adv.*, 2017, **7**, 16078-16086.

**Table S3** Corrosion current density ( $I_{\text{corr}}$ ), corrosion potential ( $E_{\text{corr}}$ ) and corrosion inhibition efficiency ( $\eta$ ) obtained from potentiodynamic polarization curves.

| Sample              | $I_{\text{corr}}$ (A/cm <sup>2</sup> ) | $E_{\text{corr}}$ (V) | $\eta$ |
|---------------------|----------------------------------------|-----------------------|--------|
| 2A12 Al substrate   | $1.603 \times 10^{-4}$                 | -1.264                | -      |
| PCC ceramic coating | $1.382 \times 10^{-7}$                 | -1.099                | 99.91% |
